# Supplementary material for: Promising Effects of Montelukast for Critically Ill Asthma Patients via a Reduction in Delirium
Source: MDPI journal article supplement (doi:10.3390/ph17010125), 2024-01-18
Supplement: s1 [file s1]

## Supplementary Content

**Table S1: Anti-asthma medications used to identify asthma patients**

| Active pharmaceutical ingredients                                                                                                                                                                                                                                                                                                                                                                                                                                                                                                                                                                                                                      |
|--------------------------------------------------------------------------------------------------------------------------------------------------------------------------------------------------------------------------------------------------------------------------------------------------------------------------------------------------------------------------------------------------------------------------------------------------------------------------------------------------------------------------------------------------------------------------------------------------------------------------------------------------------|
| Beclomethasone, Levalbuterol, Ketotifen fumarate, Albuterol, Albuterol-sulfate, Albuterol-Ipratropium, Aminophylline, Arformoterol, Beclomethasone-Dipropionate, Fluticasone-Vilanterol, Arformoterol, Budesonide-formoterol, Mometasone-formoterol, Fluticasone furoate-vilanterol, Fluticasone propion-salmeterol, Fluticasone-Salmeterol, Formoterol, Formoterol-fumarate, Ipratropium-bromide, Ipratropium-Albuterol, Levalbuterol, Levalbuterol-Tartrate, Fomoterol-Fumarate, Pirbuterol, Salmeterol, Salmeterol Xinafoate, Tiotropium Br/Olodaterol, Terbutaline Sulfate, Tiotropium-Bromide, Tiotropium-olodaterol, Ketotifen, and Zafirlukast. |

Note: Listed here are the de-duplicated drug names, excluding the drug trade names as well as suffixes.

**Table S2: Interaction Models of Exposure and Race**

| Variable              | Coefficient        | Standard Error | OR (95% CI)                      | p-value            |
|-----------------------|--------------------|----------------|----------------------------------|--------------------|
| Pre-ICU MTK exposure  | $\beta_1$ : -0.527 | 0.219          | 0.591 (0.384-0.908) <sup>c</sup> | 0.016 <sup>a</sup> |
| Myocardial infarction | $\beta_2$ : -0.281 | 0.375          | 0.755 (0.362-1.574)              | 0.454 <sup>a</sup> |
| Interaction item      | $\beta_3$ : 1.222  | 0.506          | -                                | 0.016 <sup>b</sup> |

Other covariates: race, age, gender, type of icu, SAPSII, SOFA, CCI, cerebrovascular disease, dementia, severe liver disease, and diabetes.

<sup>a</sup>A p-value less than 0.05 indicates a significant effect of the corresponding variable on the dependent variable (delirium), otherwise is no significant effect.

<sup>b</sup>The regression coefficient of the interaction term ( $\beta_3$ ) had a p-value <0.05 but the sign of  $\beta_3$  was opposite to that of  $\beta_1$ , suggesting that myocardial infarction significantly attenuates the association between pre-ICU MTK exposure and delirium during hospitalization.

<sup>c</sup>In patients without myocardial infarction, the OR for Pre-ICU MTK exposure was 0.591 (i.e.,  $\text{Exp}(\beta_1)=0.591$ ). In patients with myocardial infarction, the OR for Pre-ICU MTK exposure was 2.004 (i.e.,  $\text{Exp}(\beta_1+\beta_3)=2.004$ ).

**Table S3: Interaction Models of Exposure and Myocardial Infarction**

| Variable                 | Coefficient        | Standard Error | OR (95% CI)                      | p-value            |
|--------------------------|--------------------|----------------|----------------------------------|--------------------|
| Pre-ICU MTK exposure     | $\beta_1$ : -1.438 | 0.507          | 0.237 (0.088-0.641) <sup>c</sup> | 0.005 <sup>a</sup> |
| Race(whites)             | $\beta_2$ : -0.881 | 0.336          | 0.414 (0.214-0.801)              | 0.009 <sup>a</sup> |
| Race(other)              | $\beta_3$ : -0.871 | 0.450          | 0.419 (0.173-1.012)              | 0.053 <sup>a</sup> |
| Interaction item(whites) | $\beta_4$ : 1.284  | 0.566          | -                                | 0.023 <sup>b</sup> |
| Interaction item(other)  | $\beta_5$ : 1.732  | 0.691          | -                                | 0.012 <sup>b</sup> |

Other covariates: age, gender, type of icu, SAPSII, SOFA, CCI, myocardial infarction, cerebrovascular disease, dementia, severe liver disease, and diabetes. Race was transformed into a dummy variable and black patients were used as a reference.

<sup>a</sup>A p-value less than 0.05 indicates a significant effect of the corresponding variable on the dependent variable (delirium), otherwise is no significant effect.

<sup>b</sup>The coefficients of the interaction terms ( $\beta_4$  and  $\beta_5$ ) had a p-value <0.05 and the signs of  $\beta_4$  and  $\beta_5$  were opposite to that of  $\beta_1$ , suggesting that race significantly attenuates the association between pre-ICU MTK exposure and delirium during hospitalization.

<sup>c</sup>In black patients, the OR for Pre-ICU MTK exposure was 0.237 (i.e.,  $\text{Exp}(\beta_1)=0.237$ ). For patients of white race and those of other races, the ORs of pre-ICU MTK exposure were 0.857 (i.e.,  $\text{Exp}(\beta_1+\beta_4)=0.857$ ) and 1.342 (i.e.,  $\text{Exp}(\beta_1+\beta_5)=1.342$ ) respectively.
